# Supplementary material for: Identifying Complex lncRNA/Pseudogene–miRNA–mRNA Crosstalk in Hormone-Dependent Cancers
Source: MDPI journal article supplement (doi:10.3390/biology10101014), 2021-10-09
Supplement: s1 [file s1]

Table S1. Number of statistically significant long non-coding RNA/pseudogene-mRNA-microRNA triplets in each cancer type (the ceRNA associations from GDCRNATools and both GDCRNATools and SPONGE-Sparse Partial correlation ON Gene Expression have been tabulated separately).

| <b>Cancer</b> | <b>Number of lncRNAs, mRNAs, and miRNAs in ceRNA network</b> |                           | <b>Number of pseudogenes, mRNAs, and miRNAs in ceRNA network</b> |                           |
|---------------|--------------------------------------------------------------|---------------------------|------------------------------------------------------------------|---------------------------|
|               | <b>GDCRNATools</b>                                           | <b>GDCRNATools+SPONGE</b> | <b>GDCRNATools</b>                                               | <b>GDCRNATools+SPONGE</b> |
| <b>BRCA</b>   | 93, 432, 178                                                 | 77, 364, 177              | 33, 764, 207                                                     | 27, 571, 206              |
| <b>COAD</b>   | 50,219, 168                                                  | 28, 148, 160              | 57, 1044, 208                                                    | 40, 521, 204              |
| <b>PRAD</b>   | 86, 354, 178                                                 | 61, 325, 178              | 42, 1339, 208                                                    | 30, 1183, 206             |
| <b>READ</b>   | 89, 353, 176                                                 | 24, 155, 170              | 60, 1206, 207                                                    | 28, 344, 203              |
| <b>UCEC</b>   | 99, 359, 182                                                 | 48, 163, 179              | 60, 654, 209                                                     | 24, 207, 206              |
| <b>Shared</b> | 3, 12, 74                                                    | 2, 9, 74                  | 2, 3, 57                                                         | None                      |

\*lncRNA, long non-coding ribonucleic acid; mRNA, messenger RNA; miRNA, microRNA; SPONGE, Sparse Partial correlation ON Gene Expression; BRCA, breast cancer; COAD, colon cancer; READ, rectal cancer; UCEC, endometrial cancer, Shared, common among BRCA, PRDA, (COAD/READ), and UCEC. GDCRNATools+SPONGE implies statistically significant ceRNA associations from both GDCRNATools and SPONGE.
